# Supplementary material for: Mitochondrial RNA in Alzheimer’s Disease Circulating Extracellular Vesicles
Source: PubMed Central journal article supplement (PMC7701247; doi:10.3389/fcell.2020.581882), 2020-11-16

## Mitochondrial RNA in Alzheimer's Disease Circulating Extracellular Vesicles

Kyoung Mi Kim<sup>1,3,\*</sup>, Qiong Meng<sup>1,\*</sup>, Olivia Perez de Acha<sup>1</sup>, Maja Mustapic<sup>2</sup>, Aiwu Cheng<sup>1</sup>, Erden Eren<sup>2</sup>, Gautam Kundu<sup>1</sup>, Yulan Piao<sup>1</sup>, Rachel Munk<sup>1</sup>, William H. Wood III<sup>1</sup>, Supriyo De<sup>1</sup>, Ji Heon Noh<sup>4</sup>, Michael Delannoy<sup>5</sup>, Lesley Cheng<sup>6</sup>, Kotb Abdelmohsen<sup>1</sup>, Dimitrios Kapogiannis<sup>2,\*\*</sup>, and Myriam Gorospe<sup>1,\*\*</sup>

<sup>1</sup>Laboratory of Genetics and Genomics and <sup>2</sup>Laboratory of Clinical Investigation, National Institute on Aging Intramural Research Program, National Institutes of Health, Baltimore, MD, USA; <sup>3</sup>Department of Biological Sciences and <sup>4</sup>Department of Biochemistry, Chungnam National University, Daejeon, Republic of Korea; <sup>5</sup>Department of Cell Biology and Imaging Facility, Johns Hopkins University School of Medicine, Baltimore, MD, USA; <sup>6</sup>Department of Biochemistry and Genetics, School of Molecular Science, La Trobe University, Melbourne, Australia.

\*Co-first authors

\*\*Correspondence:

National Institute on Aging IRP, NIH  
251 Bayview Blvd, Baltimore, MD 21224, USA  
[kapogiannisd@mail.nih.gov](mailto:kapogiannisd@mail.nih.gov); +1-410-350-3953  
[myriam-gorospe@nih.gov](mailto:myriam-gorospe@nih.gov); +1-410-454-8412

Running title: mt-RNAs in AD EVs

## SUPPLEMENTAL FIGURE LEGENDS

### **Figure S1. Additional information on RNA-seq analysis of plasma EVs from AD and MCI**

**individuals.** (A) Percentage of RNA reads mapping to different types of transcripts in EVs from human plasma samples. (B) Heatmap of the 37 mt-RNAs (MCI vs. HC, AD vs. HC). Scale indicates  $\text{Log}_2(\text{Fold change})$ .

### **Figure S2. Additional analysis of protein contents in EVs from cultured cells following neurotoxic**

**damage.** (A) RT-qPCR analysis of RNA present in EVs from astrocytoma cells treated as indicated to quantify the levels of several control transcripts, including *GAPDH* and *ACTB* mRNAs, highly abundant in EVs, and *CDKN2A* and *CDKN1A* mRNAs, in low abundance in EVs. Data represent the means  $\pm$  S.E.M. from three independent experiments. (B,C) Ponceau S staining of the Western blots shown in Figure 5 using astrocytoma cell lysates and secreted EVs following treatment with A $\beta$ 42 (B) or H<sub>2</sub>O<sub>2</sub> (C).

### **Figure S3. Additional analysis of protein contents in cultured cells and the Size characterization of**

**EVs by Nanoparticle Tracking Analysis (NTA).** (A) Western blot analysis of the levels of apoptotic markers cleaved PARP and cleaved caspase-3 as well as loading control GAPDH in whole-cell lysates obtained from astrocytes after the indicated treatments with A $\beta$ 42 or H<sub>2</sub>O<sub>2</sub>. Western blot analysis of whole-cell lysates from microglia cells treated with etoposide for 18 h were included as positive controls for cleaved caspase 3 and cleaved PARP. (B) Size distribution of EVs obtained from astrocytes after the indicated treatments; traces were obtained by Nanoparticle Tracking Analysis (NTA) using a NanoSight instrument.

## **SUPPLEMENTAL MATERIAL AND METHODS**

### **Nanoparticle Tracking Analysis for EVs**

For Nanoparticle Tracking Analysis (NTA) to determine EV concentration and size, 300  $\mu$ L of the EVs prepared in filtered PBS were measured on the NS300 instrument (NanoSight, Aumesbery, UK). NTA analytical software (NanoSight NTA version 3.2) was used for image capture and data analysis.

### **Additional RT-qPCR analysis from EVs**

RT-qPCR validation of RNA in EVs was performed as indicated in the main manuscript. Additional amplicons were measured using the following primer pairs (each forward and reverse):

TGCACCACCAACTGCTTAGC and GGCATGGACTGTGGTCATGAG for *GAPDH* mRNA,  
GCACAGAGCCTCGCCTT and GTTGTCGACGACGAGCG for *ACTB* mRNA,  
GTTACGGTCGGAGGCCG and GTGAGAGTGGCGGGGTC for *CDKN2A* mRNA, and  
AGTCAGTTCCTTGTGGAGCC and CATGGGTCTGACGGACAT for *CDKN1A* mRNA.

### **Protein analysis for cell apoptosis**

Whole-cell lysates and used for Western Blot as described in the main text. After size-fractionation by SDS-PAGE and transfer of whole-cell lysates, the blots were incubated with antibodies that recognized cleaved PARP (Santa Cruz Biotechnology), cleaved caspase 3, and GAPDH (Cell Signaling Technology).

Kim, Meng, et al. Supplemental Figure 1

**A**

**Total EV Transcripts**

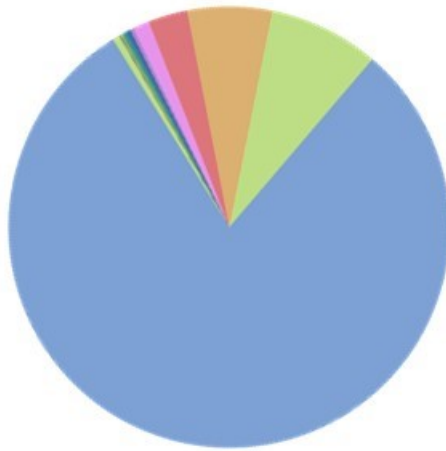

- Protein coding
- Pseudogene
- Antisense
- lincRNA
- Processed transcript
- Sense overlapping
- Sense intronic
- miRNA
- IgV gene
- Mt-tRNA
- miscRNA
- Others

**B**

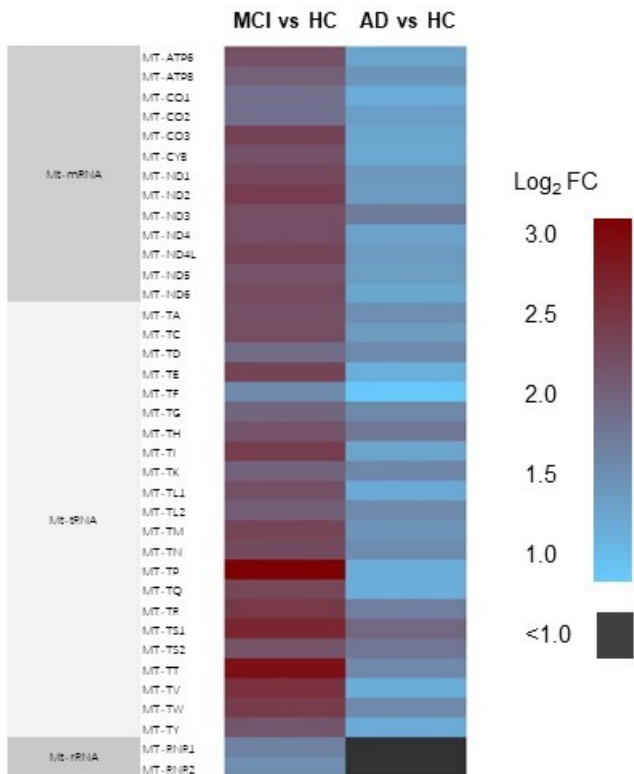

Kim, Meng, et al. Supplemental Figure 2

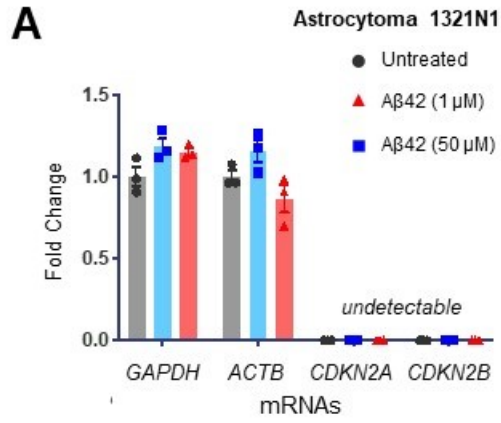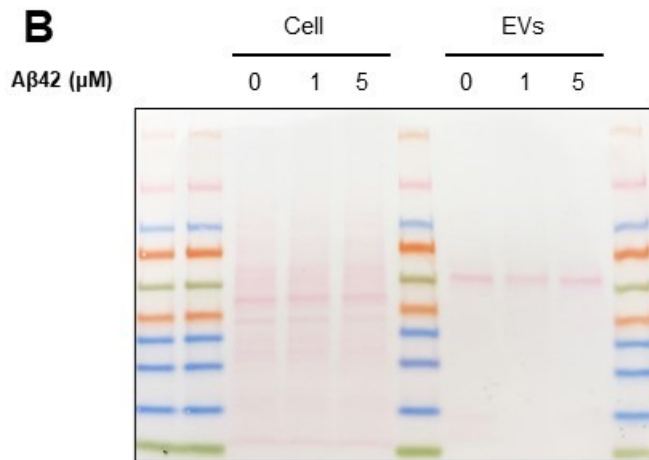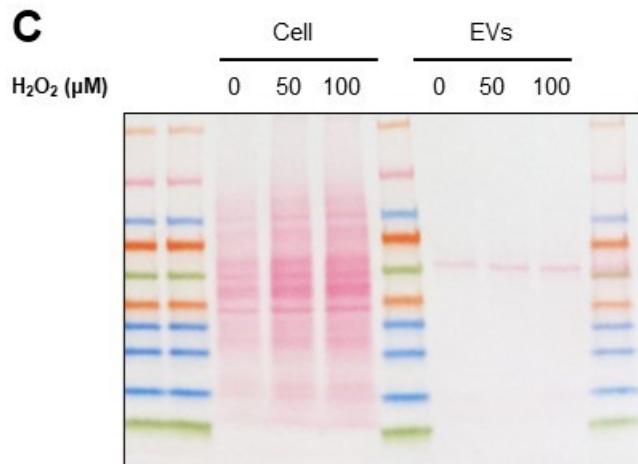

Kim, Meng, et al. Supplemental Figure 3

**A**

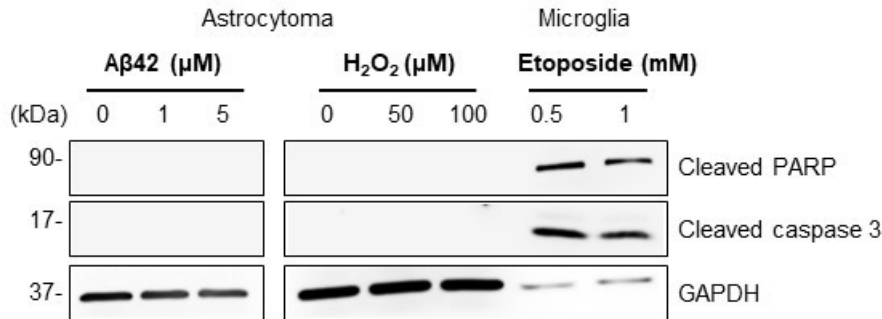

**B**

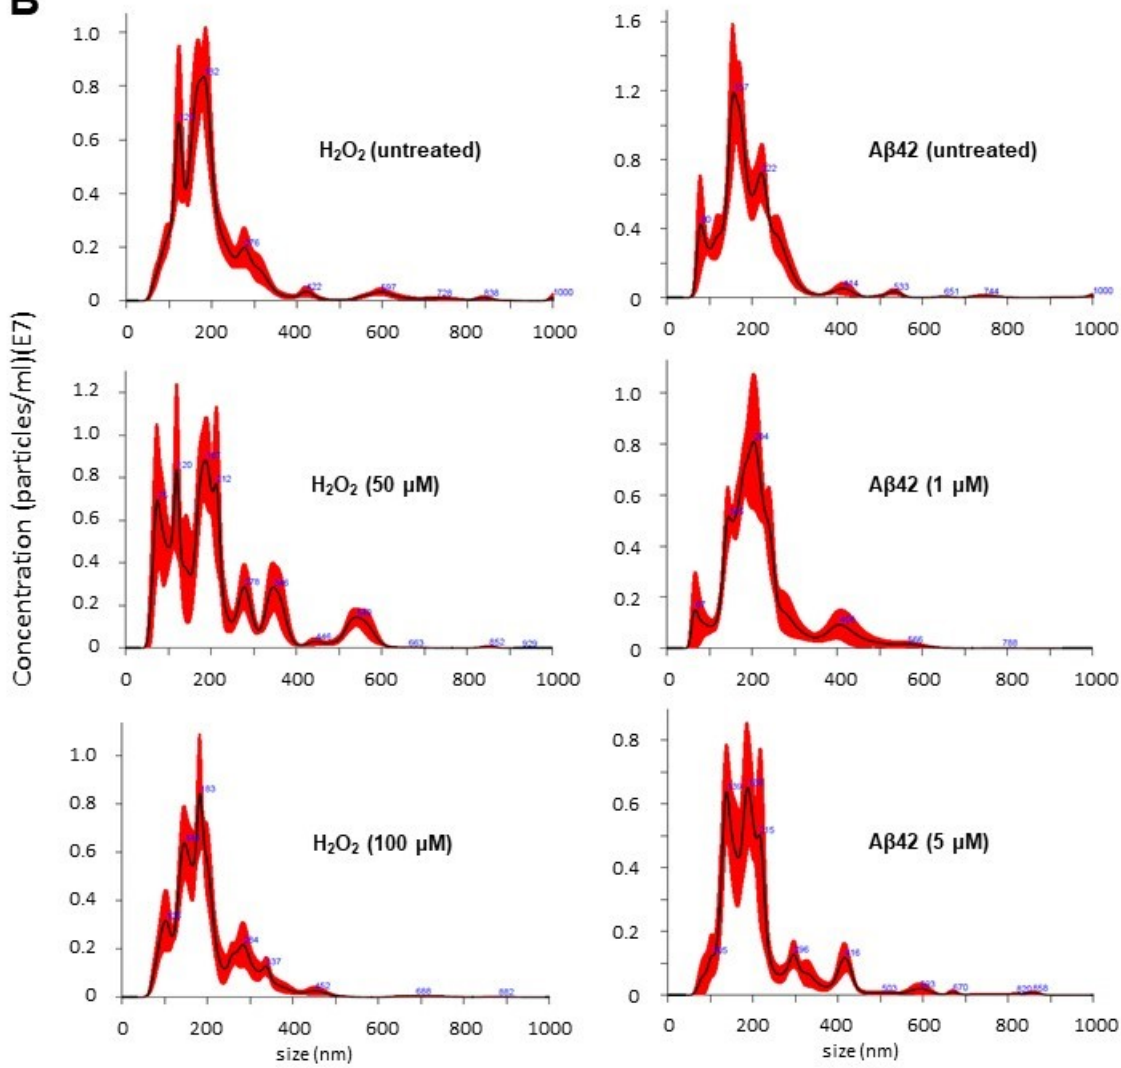

Supplement: Data_Sheet_1.pdf [file Data_Sheet_1.pdf]
